# Supplementary material for: Phenotypic and metabolic plasticity shapes life‐history strategies under combinations of abiotic stresses
Source: PubMed Central journal article supplement (PMC6508786; doi:10.1002/pld3.113), 2019-01-10
Supplement: PLD3-3-e00113-s001.pdf [file PLD3-3-e00113-s001.pdf]

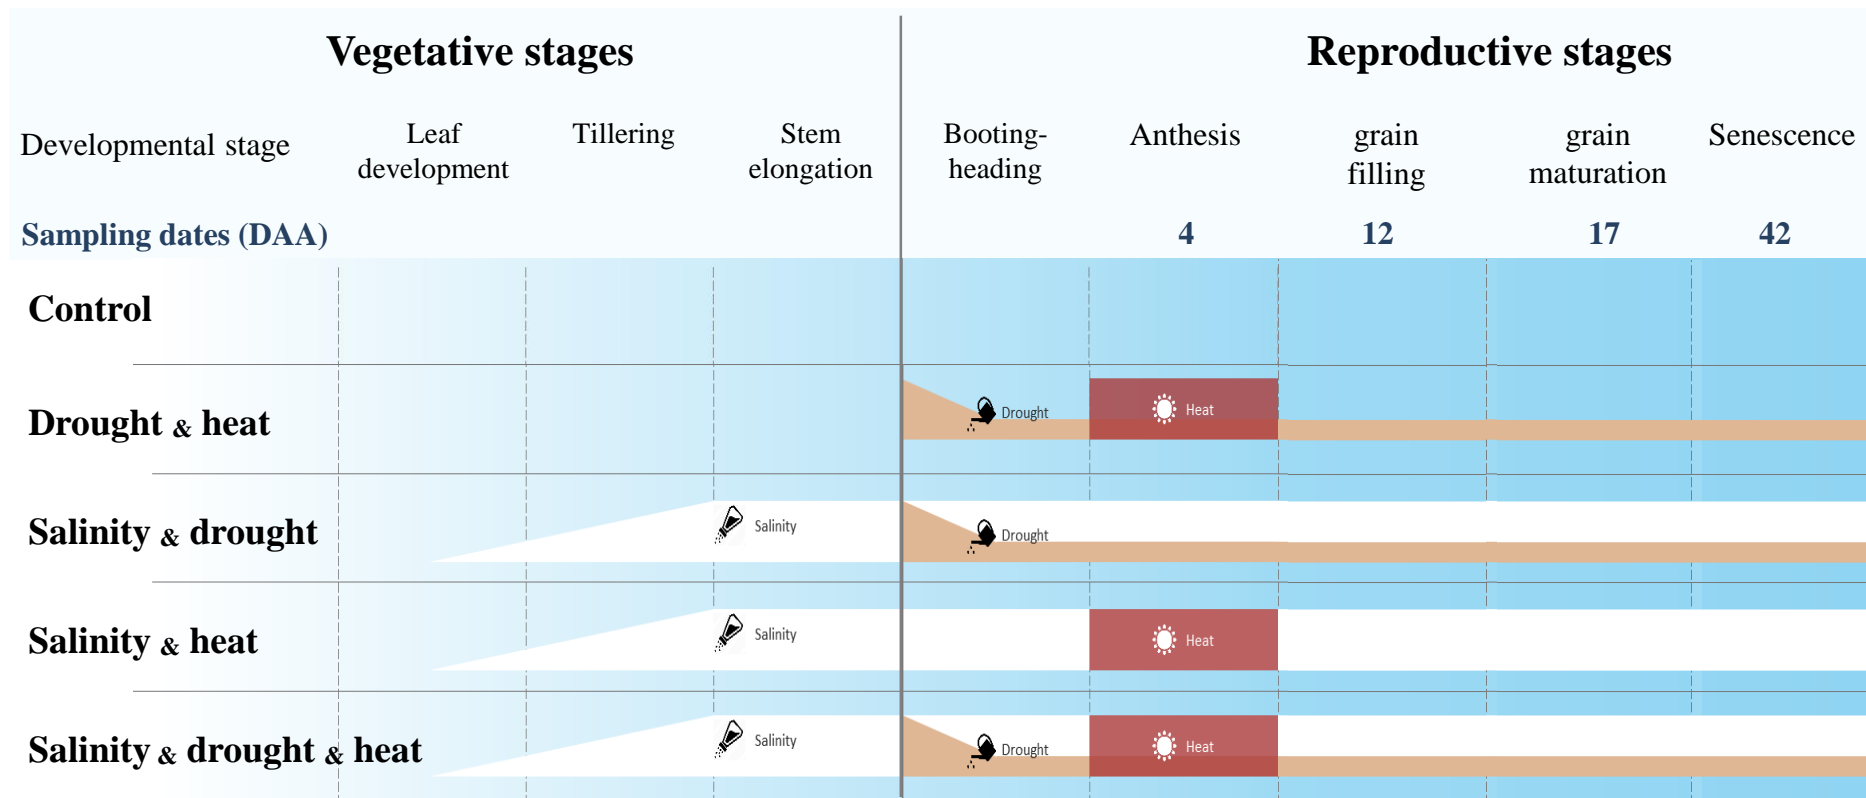

**Figure S1.** A schematic overview of the stress combination assay. *Brachypodium distachyon* plants were subjected to the stresses based on their developmental stages under the Mediterranean-like conditions (i.e. salinity stress was applied at leaf development, drought at booting-heading stages and heat at anthesis). Plants were samples at 4, 12, 17 and 42 days after anthesis (DAA).
