# Supplementary material for: Phenotypic and metabolic plasticity shapes life‐history strategies under combinations of abiotic stresses
Source: PubMed Central journal article supplement (PMC6508786; doi:10.1002/pld3.113), 2019-01-10
Supplement: PLD3-3-e00113-s002.pdf [file PLD3-3-e00113-s002.pdf]

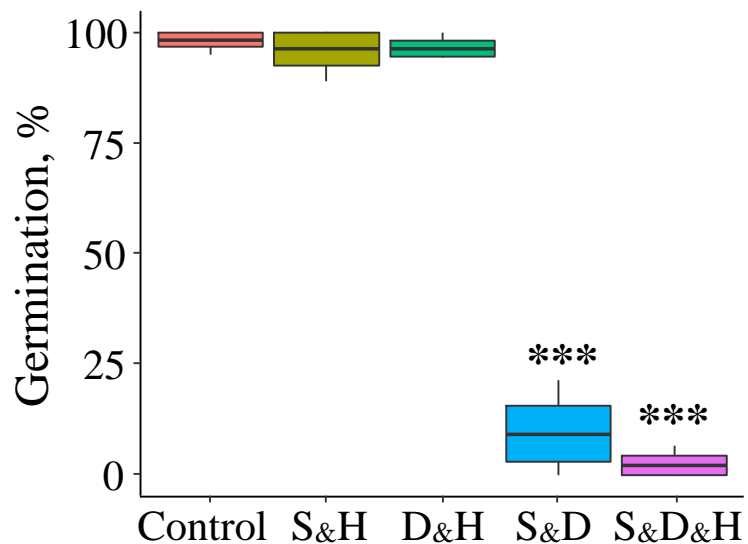

**Figure S2.** Box plot of germination rate of grains that developed on plants subjected to combinations of stresses. \*\*\* indicates a significant difference at  $P < 0.001$ , as determined by Dunnet's test. Values are mean ( $n=3$ )  $\pm$  SE. Growth conditions are as follows: salinity and heat (S&H), drought and heat (D&H), salinity and drought (S&D), salinity, drought and heat (S&D&H).
