# Supplementary material for: Phenotypic and metabolic plasticity shapes life‐history strategies under combinations of abiotic stresses
Source: PubMed Central journal article supplement (PMC6508786; doi:10.1002/pld3.113), 2019-01-10
Supplement: PLD3-3-e00113-s003.pdf [file PLD3-3-e00113-s003.pdf]

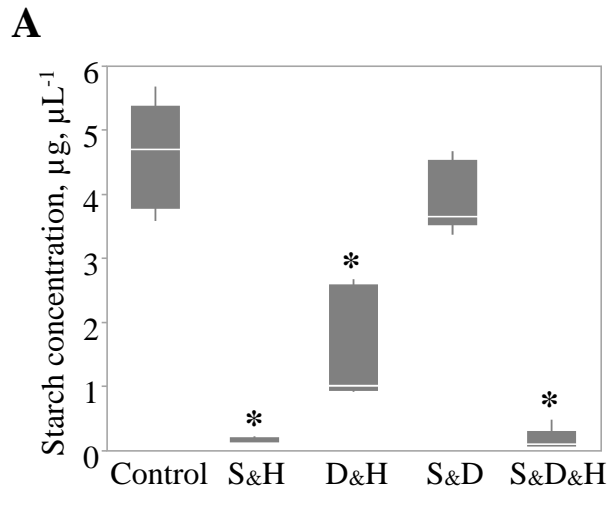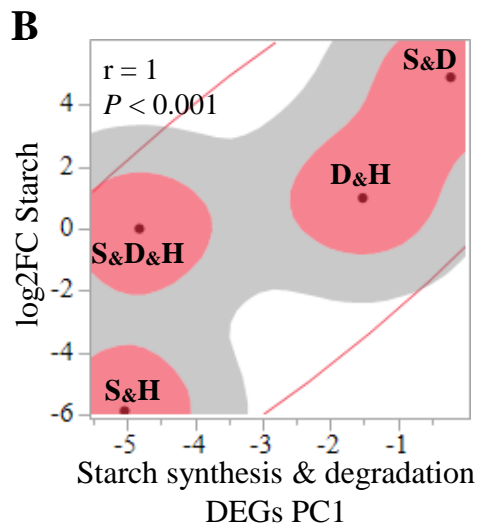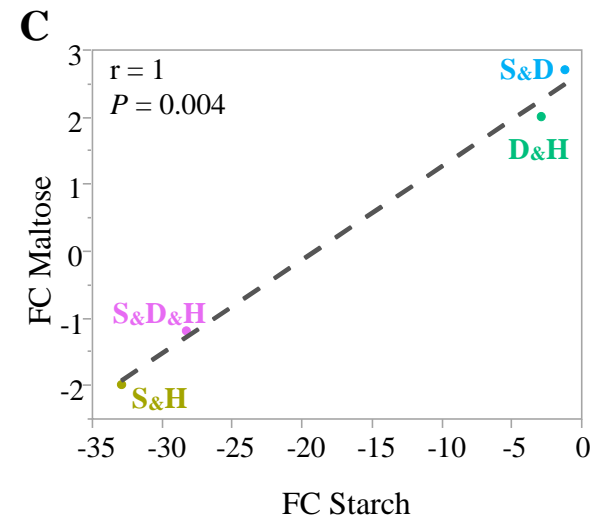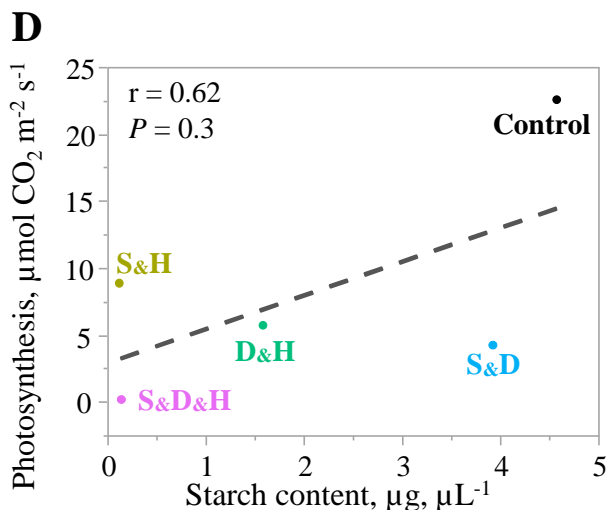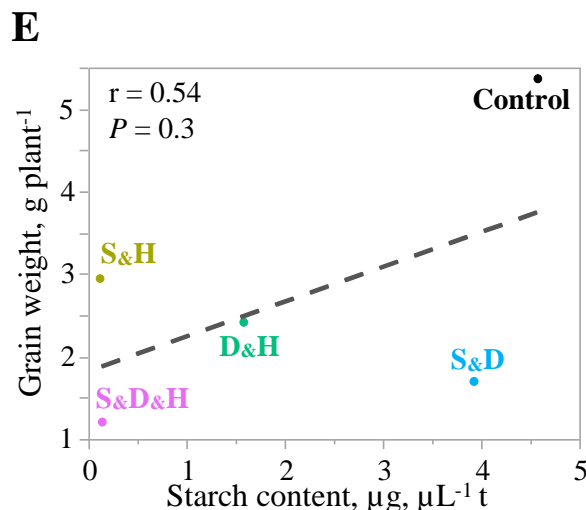

**Figure S3.** Starch content in leaves of *Brachypodium distachyon* and its association with physiological traits or gene expression pattern. (A) Box plot of starch content under control and combinations of stresses. \* indicates a significant difference at  $P \leq 0.05$ , as determined by Steel method for nonparametric comparisons. Values are mean ( $n=5$ )  $\pm$  SE. (B) Correlation between first principle component (PC1) of expression pattern of genes involved in starch synthesis and degradation, and log<sub>2</sub> fold change (FC) values of starch content. Correlations between starch content and (C) maltose, (D) photosynthesis and (E) grain weight. Growth conditions are as follows: salinity and heat (S&H), drought and heat (D&H), salinity and drought (S&D), salinity, drought and heat (S&D&H).
