# Supplementary material for: Phenotypic and metabolic plasticity shapes life‐history strategies under combinations of abiotic stresses
Source: PubMed Central journal article supplement (PMC6508786; doi:10.1002/pld3.113), 2019-01-10
Supplement: PLD3-3-e00113-s004.pdf [file PLD3-3-e00113-s004.pdf]

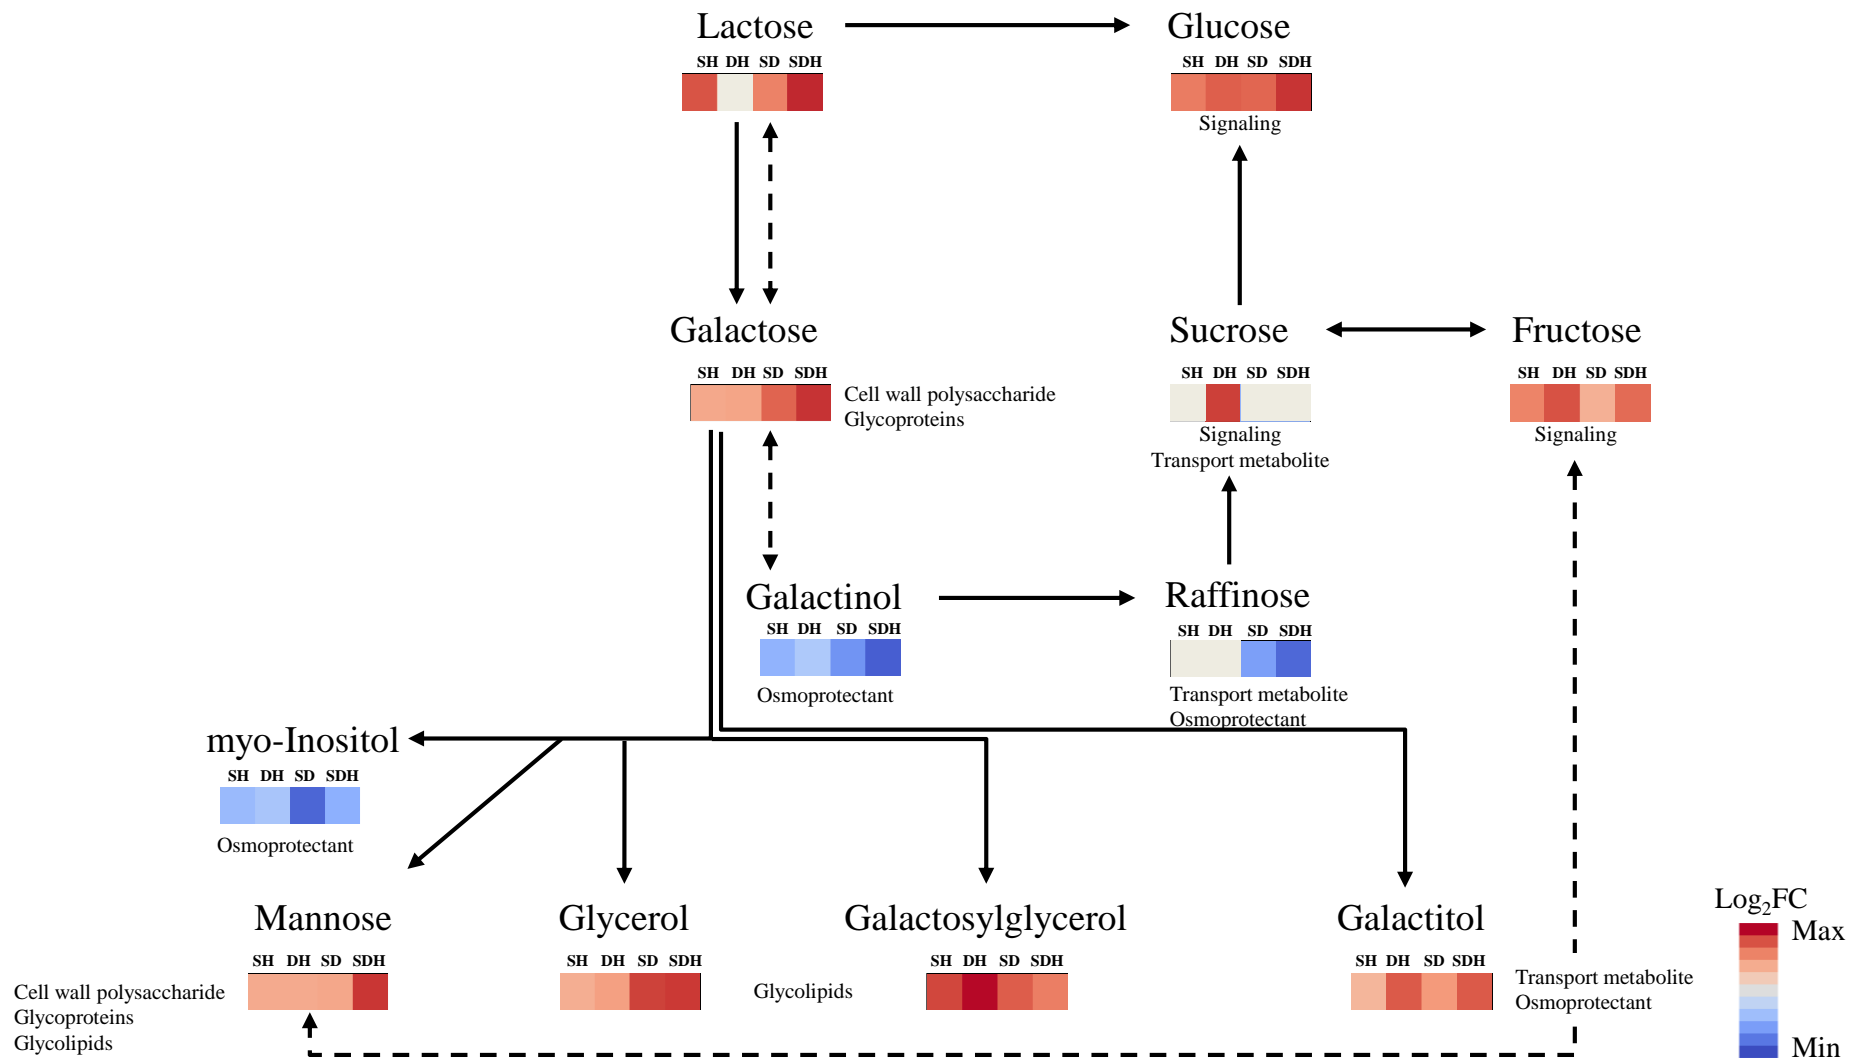

**Figure S4.** Galactose metabolic pathway under combinations of stresses. Metabolites of the galactose pathway that showed significant alterations in at least one stress combination ( $P \leq 0.05$ ), compared with control. Red and blue colors indicate accumulation and depletion of metabolite content, respectively, and white color indicates a non-significant change, compared with control. Solid line denotes one enzymatic reaction and dashed line denotes involvement of several enzymatic reactions between two metabolites. Growth conditions are as follows: salinity and heat (S<sub>&H</sub>), drought and heat (D<sub>&H</sub>), salinity and drought (S<sub>&D</sub>), salinity, drought and heat (S<sub>&D</sub><sub>&H</sub>).
