# Supplementary material for: Phenotypic and metabolic plasticity shapes life‐history strategies under combinations of abiotic stresses
Source: PubMed Central journal article supplement (PMC6508786; doi:10.1002/pld3.113), 2019-01-10
Supplement: PLD3-3-e00113-s005.pdf [file PLD3-3-e00113-s005.pdf]

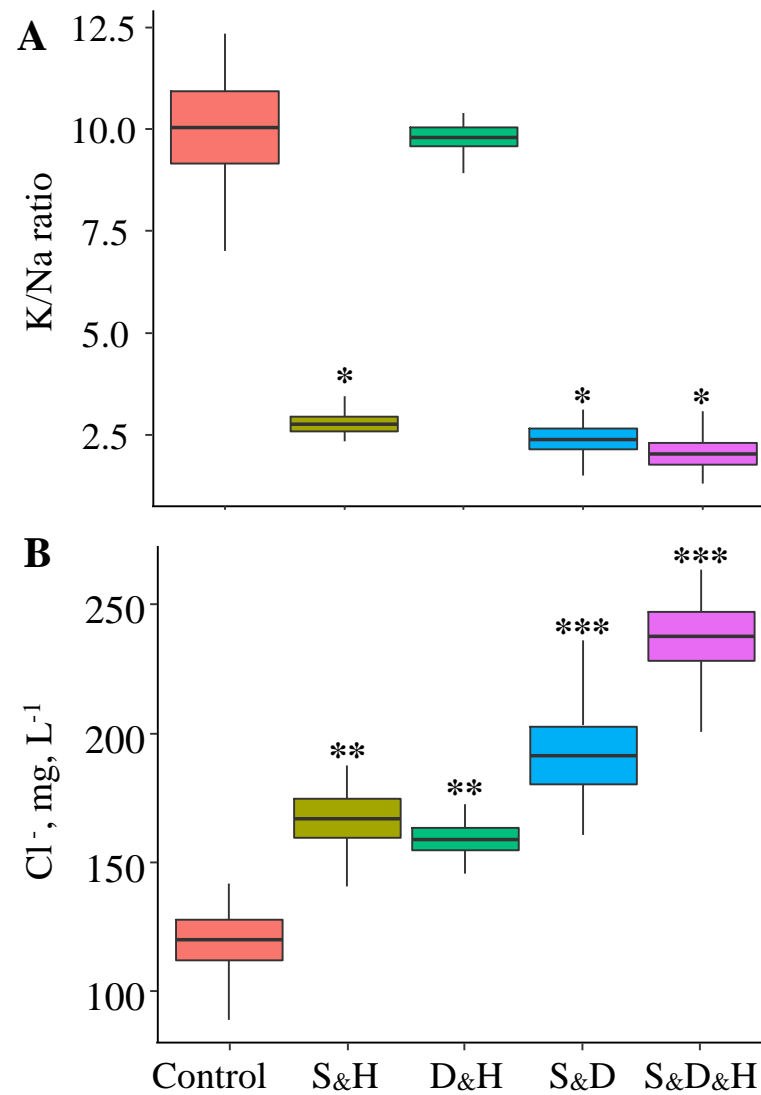

**Figure S5.** Potassium / Sodium ratio and chloride concentration in *Brachypodium distachyon* leaves under control and combinations of stresses. Box plots of (A) the ratio between Na<sup>+</sup> and K<sup>+</sup> and (B) Cl<sup>-</sup>. \*, \*\*, and \*\*\* indicate a significant difference at  $P \leq 0.05$ , 0.01, and 0.001, respectively, as determined by Dunnett's test. Values are mean ( $n=6$ )  $\pm$  SE. Growth conditions are as follows: salinity and heat (S&H), drought and heat (D&H), salinity and drought (S&D), salinity, drought and heat (S&D&H).
